# Supplementary material for: Immunological profile in cerebrospinal fluid of patients with multiple sclerosis after treatment switch to rituximab and compared with healthy controls
Source: PubMed Central journal article supplement (PMC5805315; doi:10.1371/journal.pone.0192516), 2018-02-08
Supplement: pone.0192516.s004.pdf [file pone.0192516.s004.pdf]

IL-6

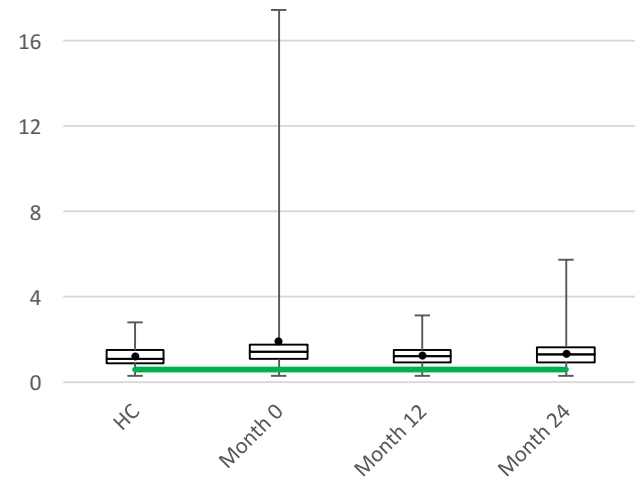

IL-6

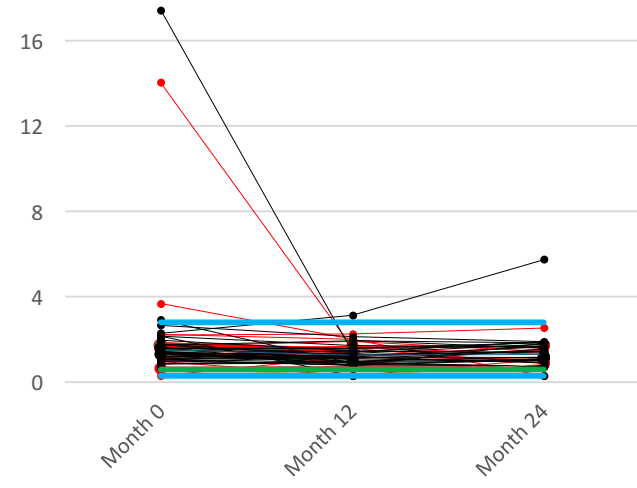

IL-8 (CXCL8)

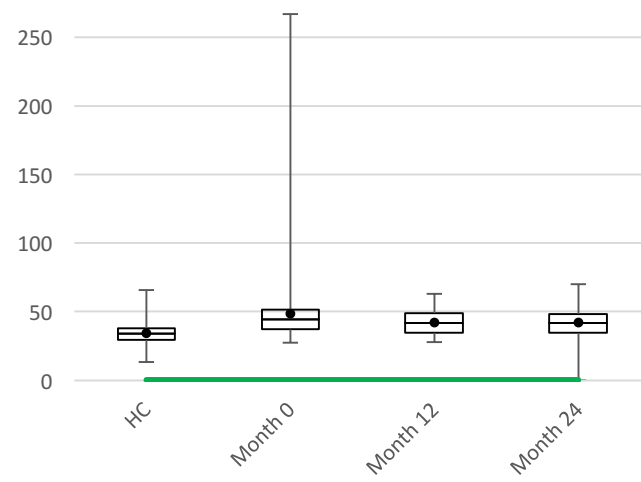

IL-8 (CXCL8)

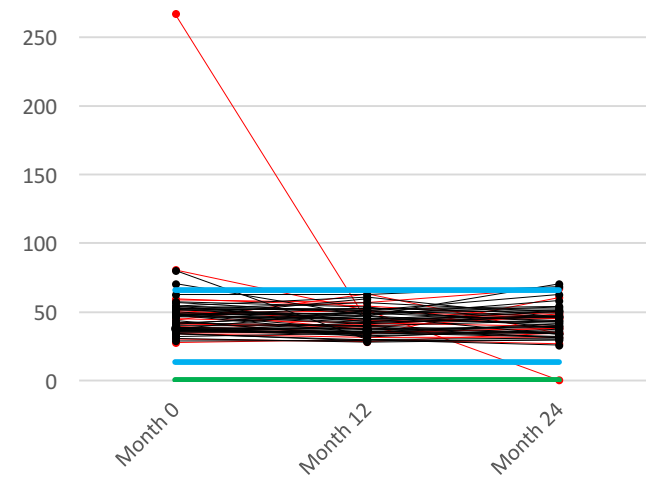

IL-15

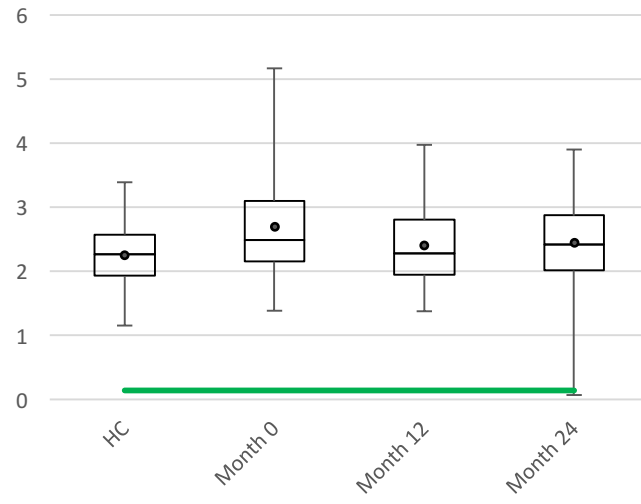

IL-15

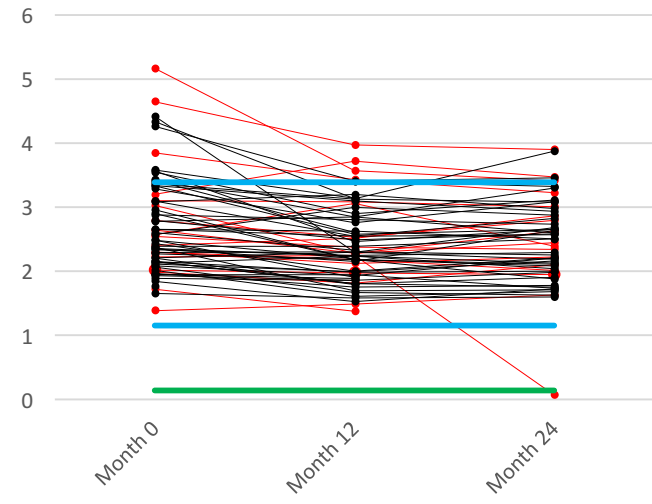

IL-5

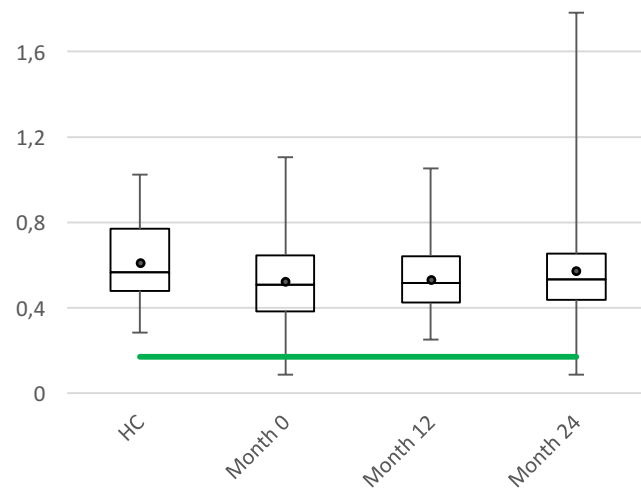

IL-5

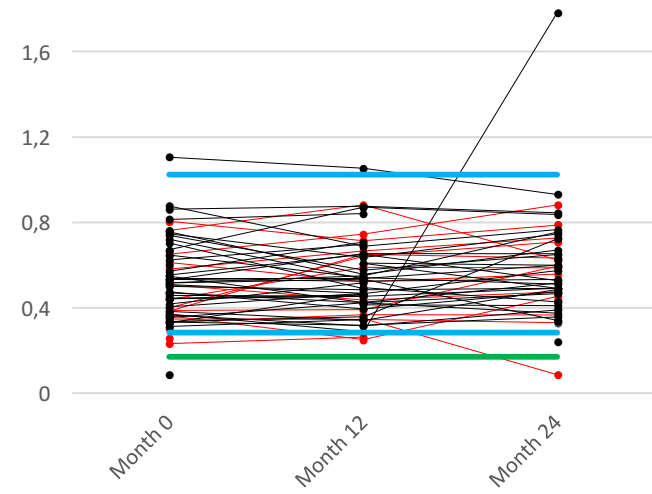

IL-7

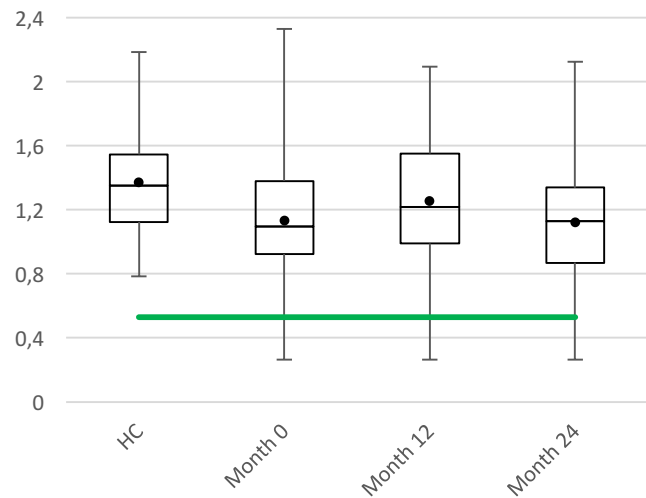

IL-7

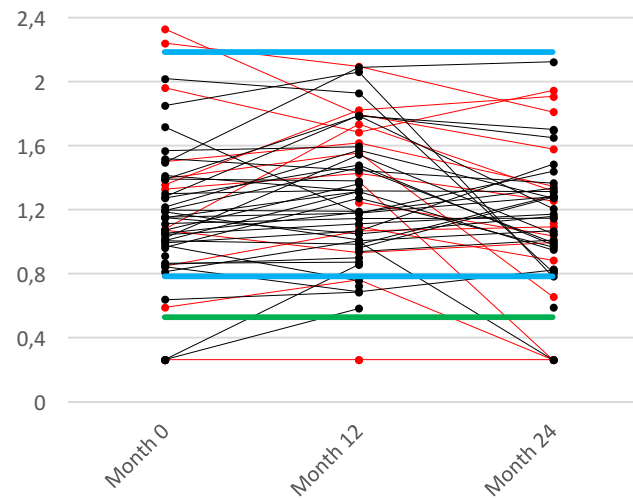

MCP-1 (CCL2)

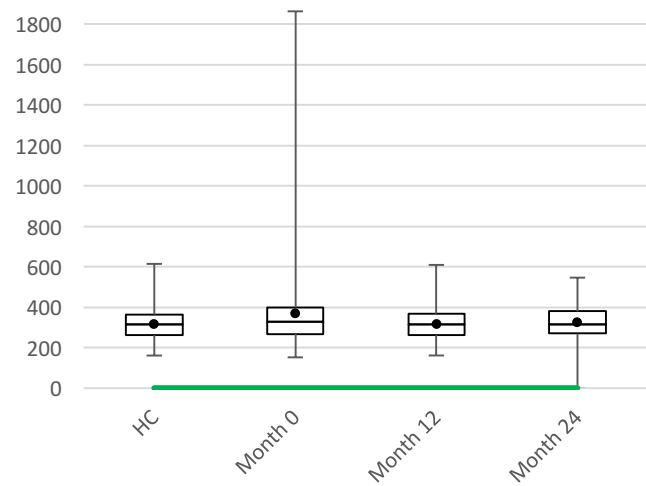

MCP-1 (CCL2)

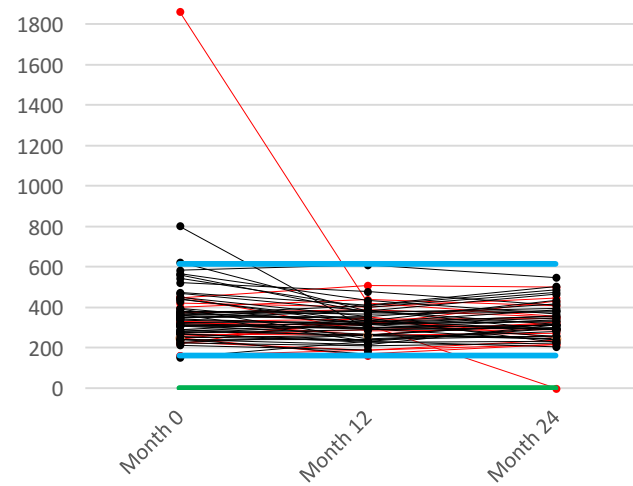

MIP-1 $\beta$  (CCL4)

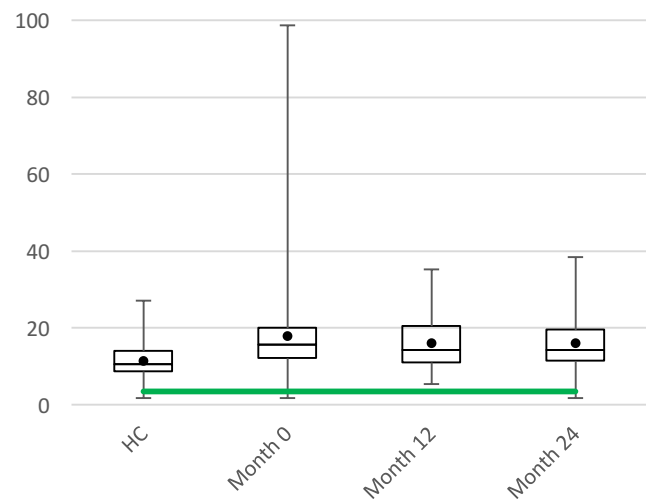

MIP-1 $\beta$  (CCL4)

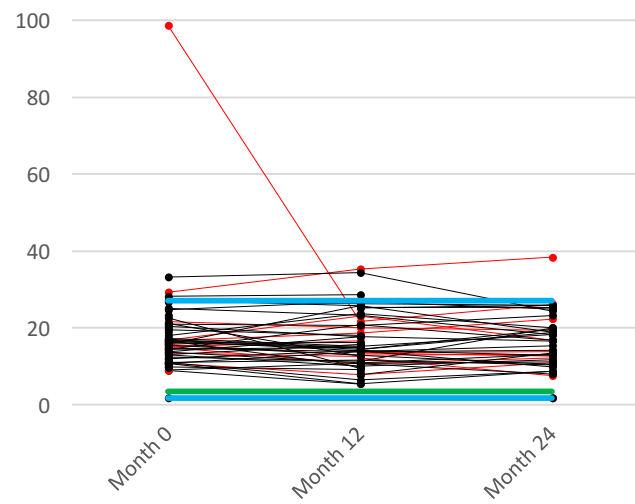

VEGFD

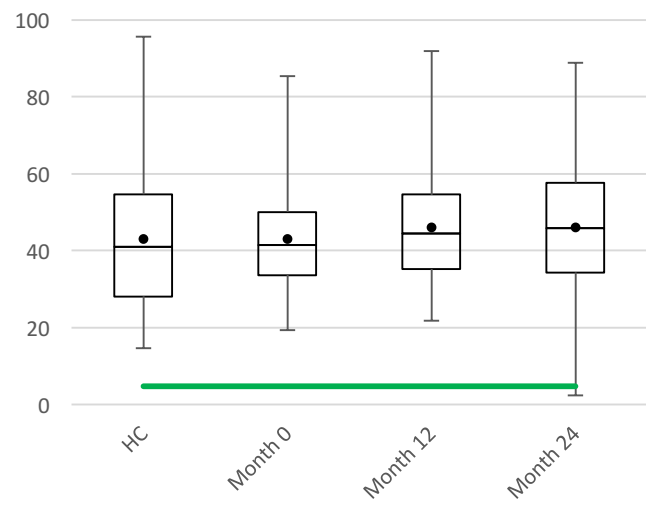

VEGFD

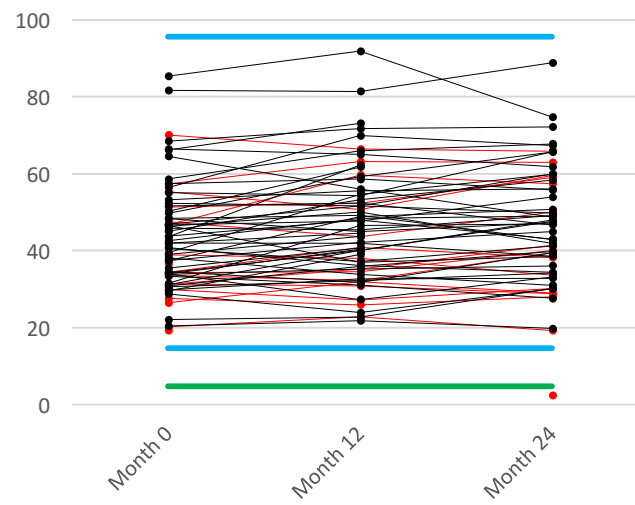

CRP

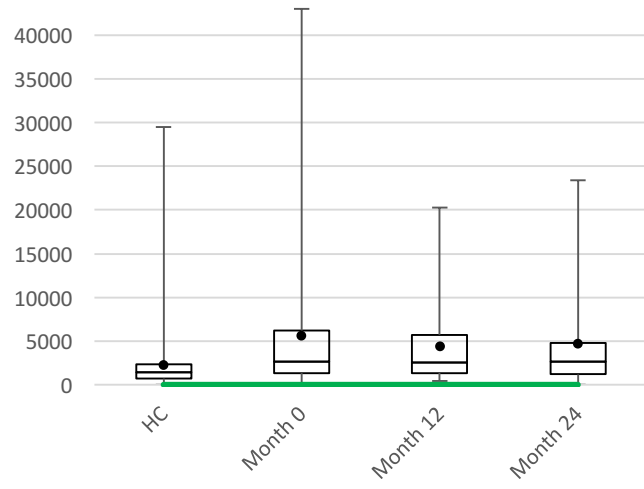

CRP

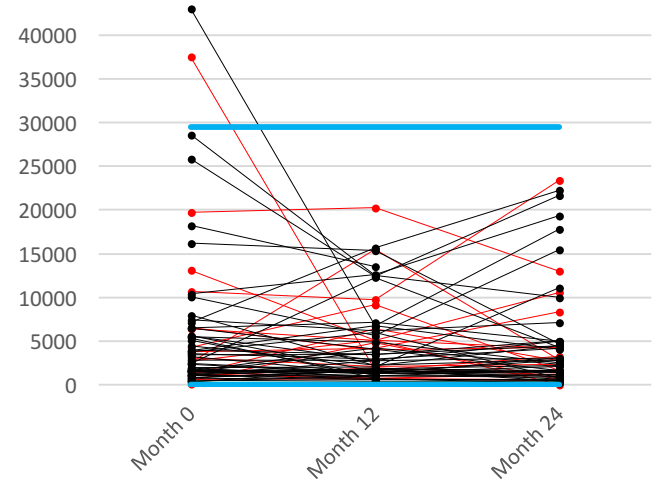

SAA

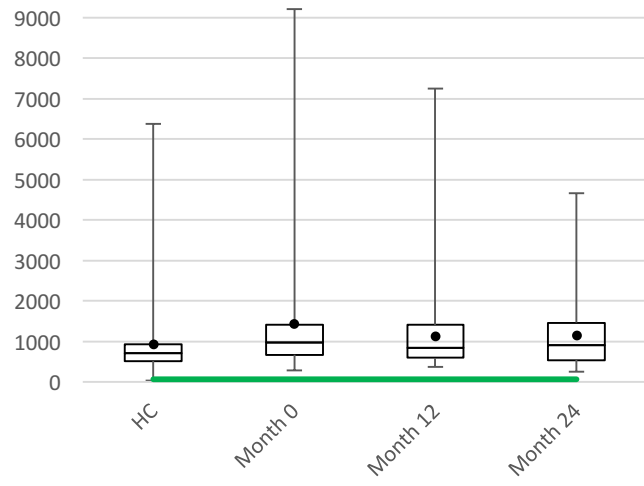

SAA

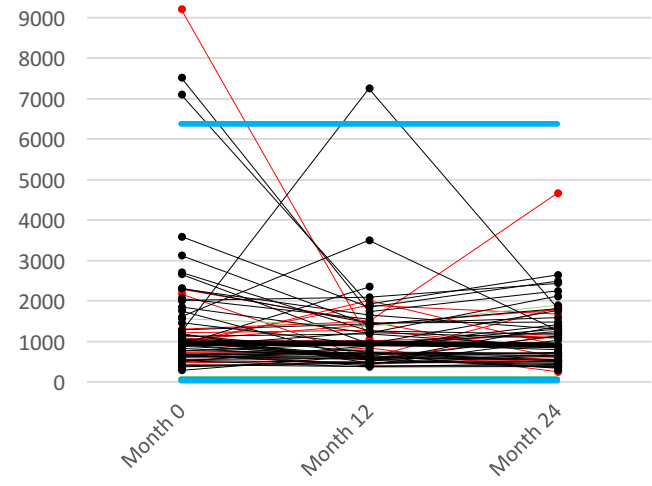

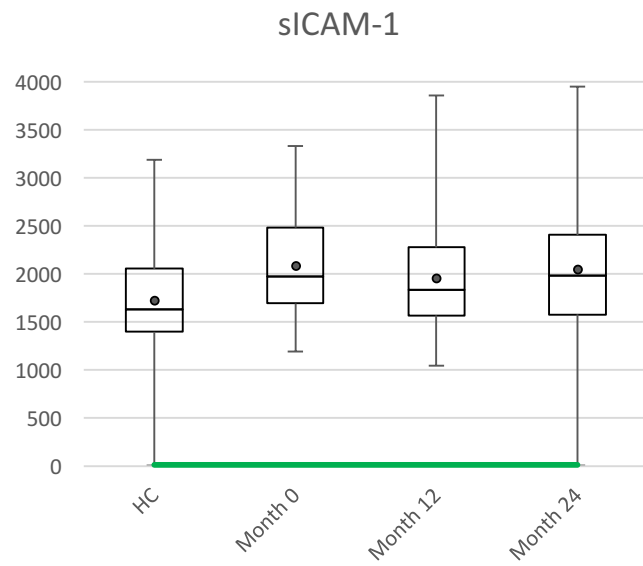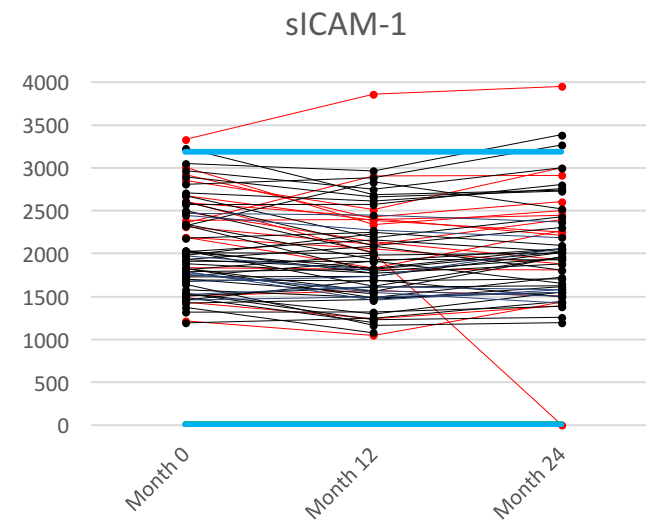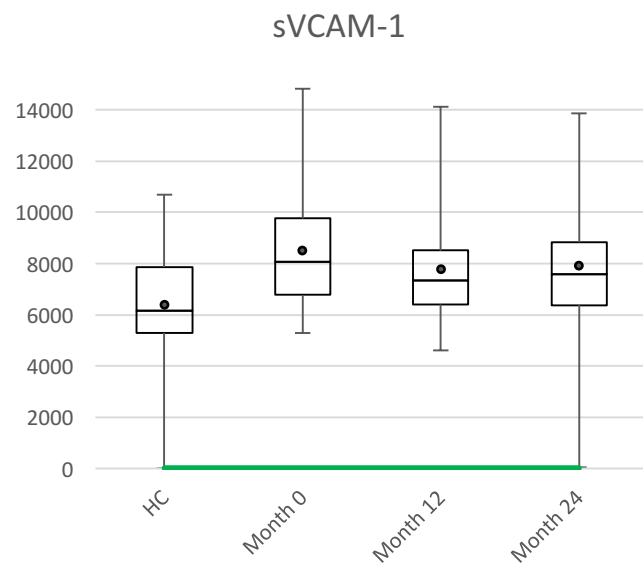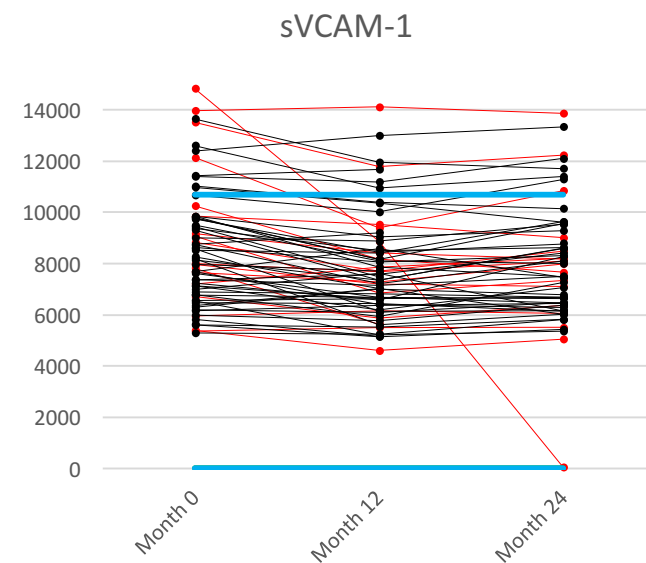

S3 Fig. Boxplots and dot-line diagrams for the analytes not presented in the main manuscript. All values in pg/mL. The fence of the whiskers represent the max-min values. Green line represent the LLOQ, blue lines represents the min-max of the HC.
